# Supplementary material for: Cellular RNA and DNA sensing pathways are essential for the dose-dependent response of human monocytes to ionizing radiation
Source: PubMed Central journal article supplement (PMC10751912; doi:10.3389/fimmu.2023.1235936), 2023-12-12
Supplement: DataSheet_1.pdf [file DataSheet_1.pdf]

# Supplementary Material

## Cellular RNA and DNA Sensing Pathways are Essential for the Dose-Dependent Response of Human Monocytes to Ionizing Radiation

Natallia Mikhalkevich, Eric Russ and Sergey Iordanskiy

### 1. Supplementary Figures

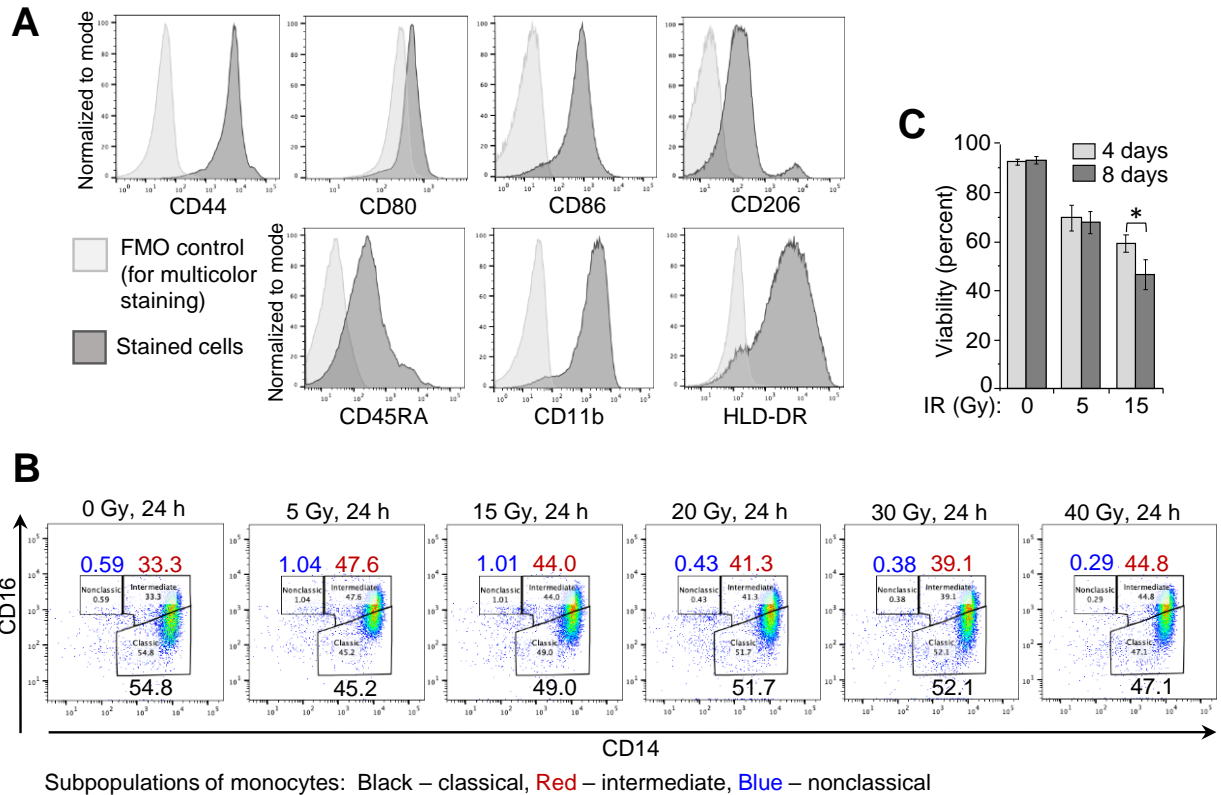

### Supplementary Figure 1. Gamma radiation changes the population profile of primary monocytes and affects cell viability at late time points.

(A) Presentation of monocyte markers on the surface of elutriated primary human monocytes measured by flow cytometry with specific staining vs. background signal determined by Fluorescence Minus One (FMO) controls in viable (DAPI-) cells (graphs show representatives of 3 independent measurements). (B) Analysis of monocyte population in fraction 5 of elutriated human PBMCs profiled by flow cytometry 24 h after exposure to indicated doses of  $\gamma$ IR, shown for 1 representative of 5 tested donors. Lineage markers were used to exclude contamination with lymphocyte subsets as described in Fig. 1A. Anti-CD14-APC and anti-CD16-PE coupled antibodies were used to outline subpopulations of classical, intermediate and non-classical monocytes. (C) Viability of THP1 cells measured by flow cytometry as a percentage of DAPI-negative cells in the total population, 4 and 8 days after exposure to indicated doses of  $\gamma$ IR. Error bars indicate  $\pm$ SD of three independent biological replicates; \*  $p < 0.01$ .

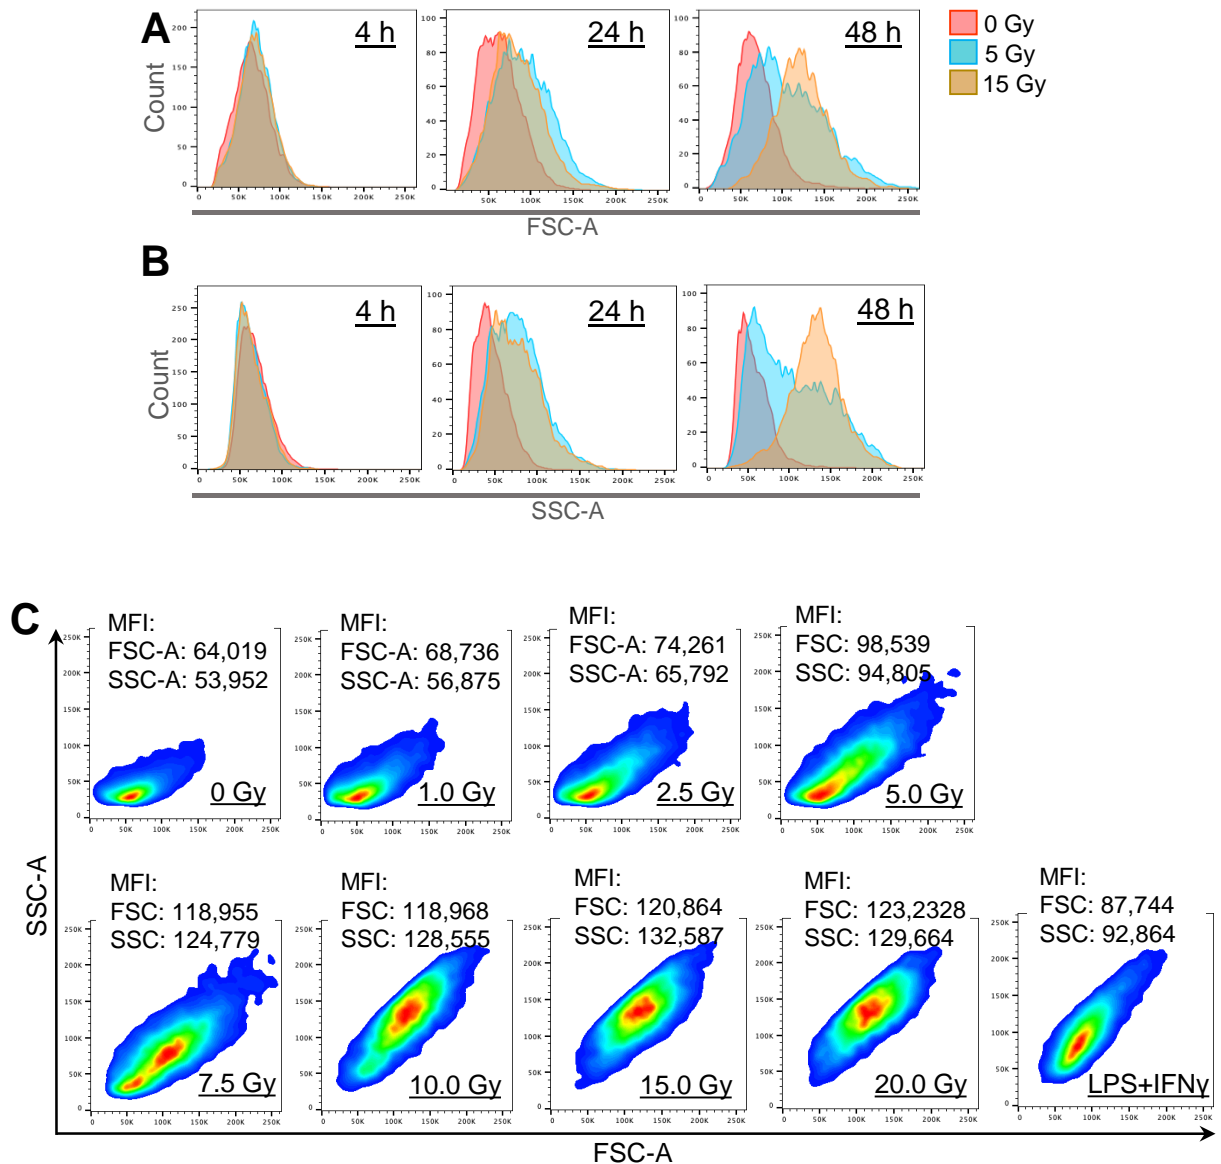

**Supplementary Figure 2. Effect of gamma radiation doses on cyto-morphological parameters of human monocytic cell line THP1.**

(A) Size distribution (FSC-A) of THP1 cells exposed to indicated  $\gamma$ IR doses, detected by flow cytometry measurement of the fluorescence intensity of viable (DAPI-) cells; 4, 24, and 48 h post-IR. (B) Cell granularity distribution (SSC-A) of the same populations (described in (C)) of viable (DAPI-) THP1 cells. (C) Pseudocolor plots (Side scatter area: SSC-A – indirect measure of cell composition/granularity vs Forward scatter area FSC-A – indirect measurement of cells size) representing distribution of viable (DAPI-negative) THP1 cells exposed to indicated  $\gamma$ IR doses, 48 h post-IR or treated with LPS (100 ng/mL) and interferon-gamma (25n/mL). MFI – median fluorescence intensity.

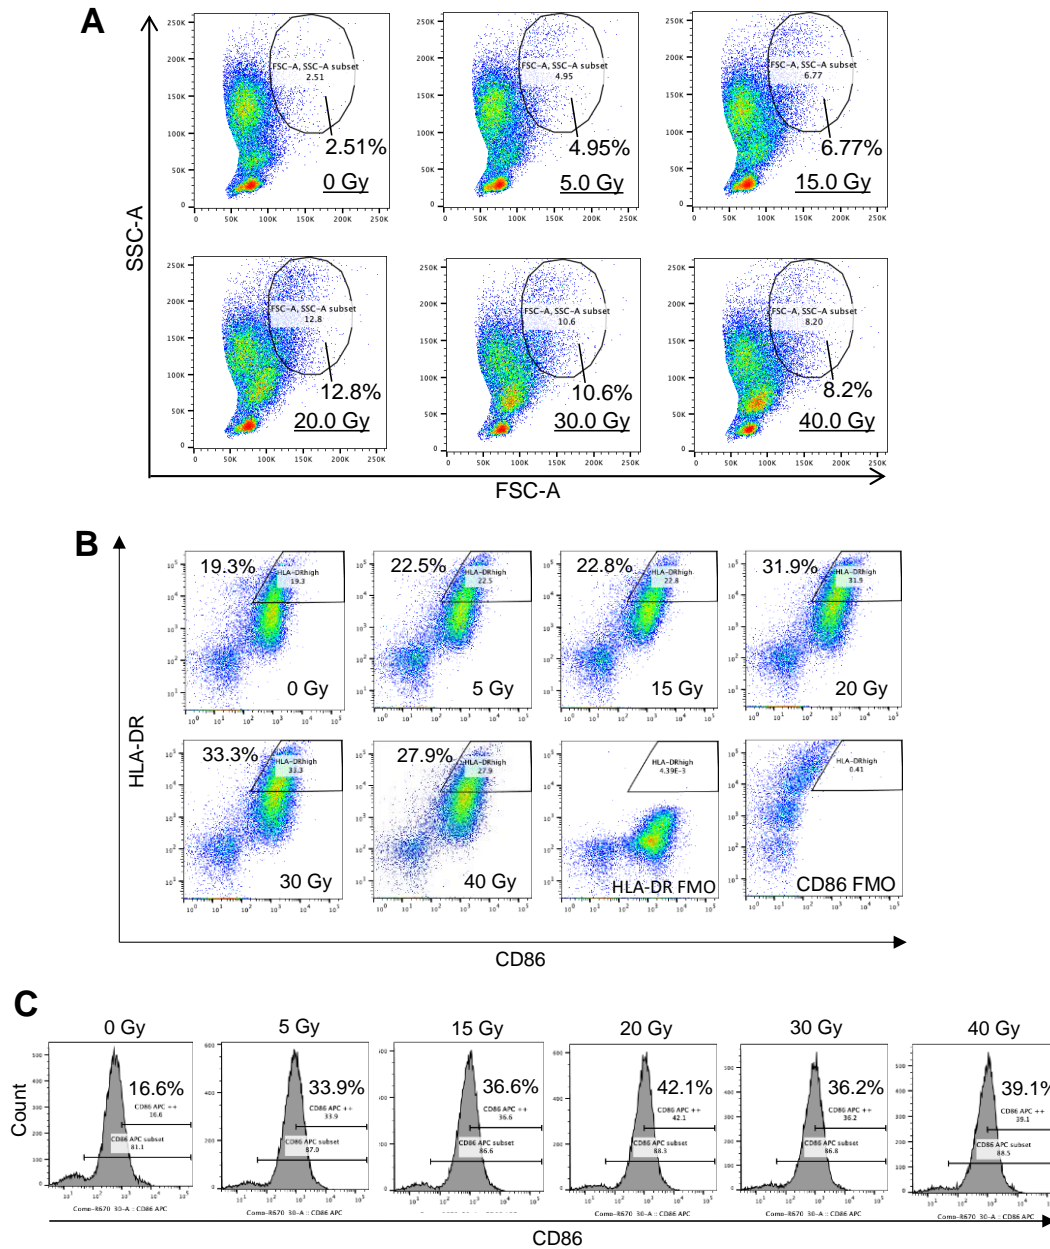

**Supplementary Figure 3. Effect of gamma radiation on cyto-morphological parameters and presentation of activation markers on the surface of primary human monocytes.**

(A) Analysis of the subset of large-size and high-granularity cells within the total population of elutriated primary human monocytes, exposed to indicated doses of  $\gamma$ IR, 48 h post-exposure (Side scatter area: SSC-A – indirect measure of cell composition/granularity vs Forward scatter area FSC-A – indirect measurement of cells size); distribution of viable (DAPI-negative) cells. (B) Analysis of the subsets of “activated” (HLA-DR<sup>high</sup>; CD86<sup>+</sup>) myeloid cells in *ex vivo* irradiated cultures of human peripheral blood elutriated monocytes after exposure to indicated doses of gamma radiation, 48 h post-exposure. Gated on single, viable (DAPI-) cells. (C) Percent of CD86<sup>high</sup> subset within the population of CD86<sup>+</sup> myeloid cells in *ex vivo* irradiated cultures of human peripheral blood elutriated monocytes upon indicated doses of gamma radiation, 24 h post-exposure.

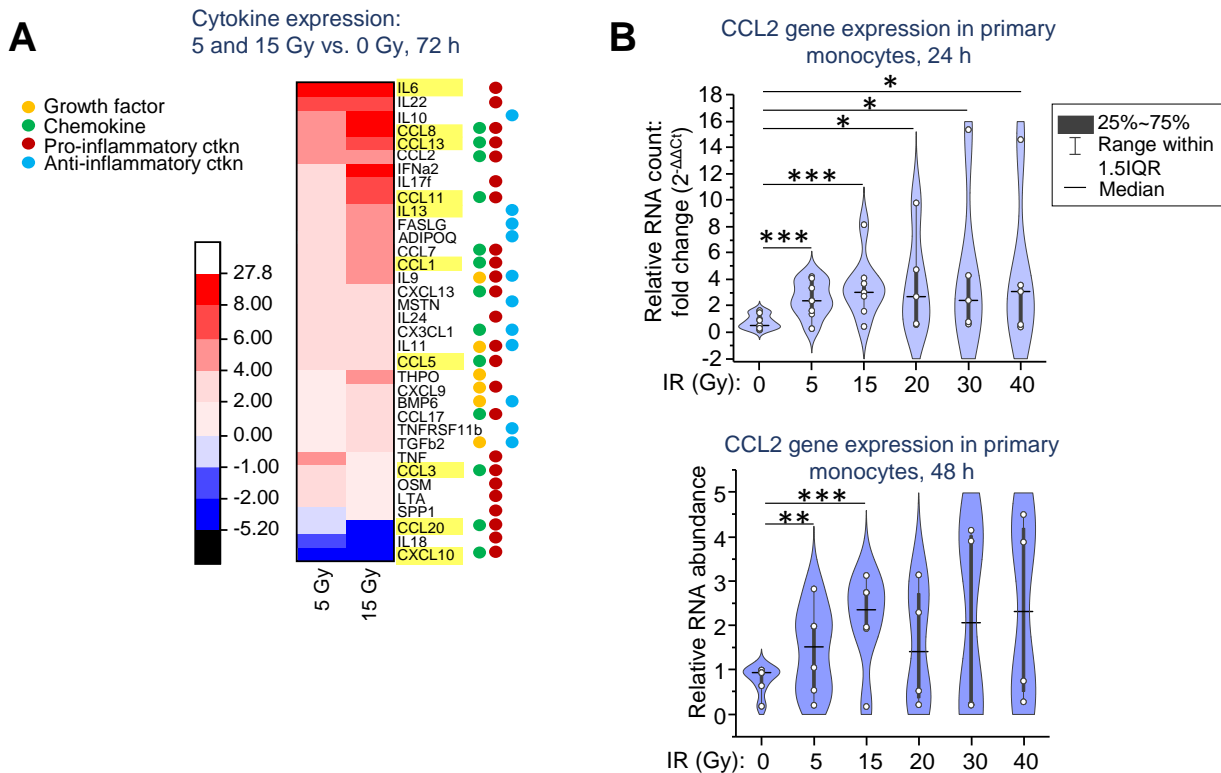

**Supplementary Figure 4. Cytokine expression in THP1 monocytic cell line and primary human monocytes exposed to different doses of gamma-radiation.**

(A) Heatmap depicting expression of differentially expressed cytokines ( $\geq 2$ -fold difference) in THP1 cells exposed to a 5 or 15 Gy  $\gamma$ IR dose vs. non-irradiated cells, measured by RT<sup>2</sup> PCR array of total cellular RNA samples, 72h after  $\gamma$ IR exposure: rows: cytokine gene codes; columns: samples. SASP marker genes are highlighted by yellow background. Color codes are shown on the separate left panel. The colored circles on the right mean: yellow – activity as a growth factor, green – chemokine, red – pro-inflammatory, blue – anti-inflammatory activities. (B) Expression of CCL2 gene in primary human monocytes exposed to indicated doses of  $\gamma$ IR, measured by RT-qPCR vs. GAPDH and GUSB reference housekeeping genes at 24 h (upper panel) and 48 h (lower panel) post-exposure. Minimum number of biological samples is 5. \*  $p < 0.05$ , \*\*  $p < 0.01$ , \*\*\*  $p < 0.001$ , paired Wilcoxon test.

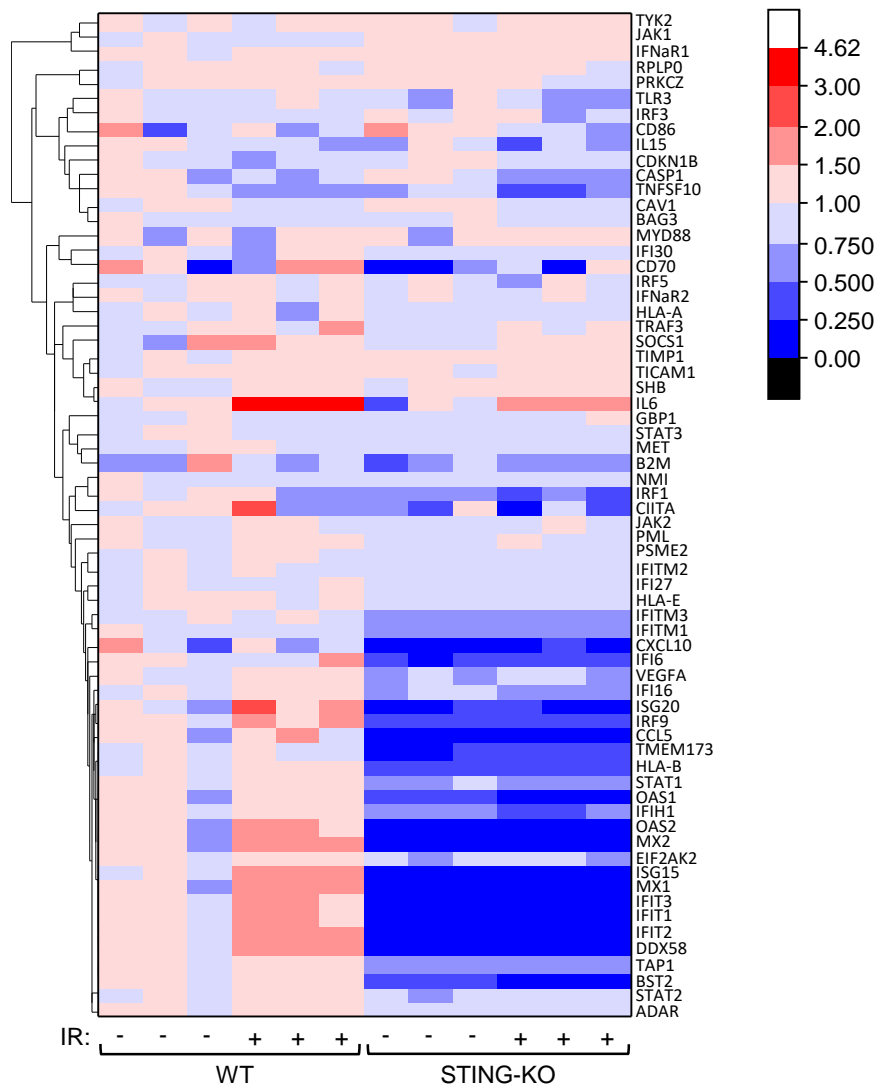

**Supplementary Figure 5. Expression of multiple interferon-stimulated genes in irradiated FaDu head and neck squamous cell carcinoma cells is STING-dependent.**

Heatmap depicting expression of interferon-stimulated genes (ISGs) in wild-type and STING-knockout FaDu cells exposed to 4 fractions of 2 Gy doses of X-ray, based on analysis of transcriptomic dataset GSE147085. Color codes are shown on the separate right panel.

## 2. Supplementary Tables

### **Excel supplementary tables:**

**Supplementary Table 1.** Cytokine gene expression values ( $\Delta\Delta\text{Ct}$ ) in THP1 cells exposed to indicated radiation doses, measured by RT-qPCR analysis of triplicated samples using RT2 PCR array at 48- and 72-hours post-exposure.

**Supplementary Table 2.** Gene expression values ( $\Delta\Delta\text{Ct}$ ) of interferon-stimulated genes in THP1-Dual, THP1-Dual IFNAR-KO, THP1-Dual MAVS-KO, and THP1-Dual STING-KO cells measured by RT-qPCR analysis of triplicated samples using RT2 PCR array.

**Supplementary Table 3.** Gene expression: RNA-seq raw values in unexposed and irradiated (RT) FaDu head and neck squamous cell carcinoma cells with/without STING-knockout (STING-KO/WT).

**Supplementary Table 4.** CPM normalized values of gene expression in unexposed and irradiated (RT) FaDu head and neck squamous cell carcinoma cells with/without STING-knockout (STING-KO/WT).

**Supplementary Table 5.** Reagents and resources.

| REAGENT or RESOURCE                            | SOURCE                   | IDENTIFIER |
|------------------------------------------------|--------------------------|------------|
| <b>Antibodies</b>                              |                          |            |
| $\beta$ -Actin (clone AC-15)                   | Millipore Sigma          | A5441      |
| GAPDH (clone 0411)                             | Santa Cruz Biotechnology | sc-47724   |
| CD11b (clone D12), APC                         | BD Biosciences           | 340936     |
| CD206 (MMR), (clone 15-2), PE/Cy7              | BioLegend                | 321124     |
| CD86 (clone BU63), APC                         | BioLegend                | 374208     |
| CD80 (B7-1), (clone 2D10.4), FITC, eBioscience | Thermo Fisher Scientific | 11-0809-42 |
| HLA-DR (clone LN3) – PE-Cyanine5, eBioscience  | Thermo Fisher Scientific | 15-9956-42 |
| CD45RA (clone HI100)- PECy7                    | BD Pharmingen            | 560675     |
| CD44 (clone 515)-PE                            | BD Pharmingen            | 550989     |
| CD14 (clone M5E2)-APC                          | BioLegend                | 301808     |
| CD16 (clone 3G8)- PE                           | BioLegend                | 302008     |
| CD19 (clone HIB19)-FITC                        | BioLegend                | 302256     |

|                                          |                           |               |
|------------------------------------------|---------------------------|---------------|
| CD 66b (clone G10f5)-FITC                | BioLegend                 | 305104        |
| CD20 (clone 2H7)-FITC                    | BioLegend                 | 302304        |
| CD3 (clone HIT3a)-FITC                   | BioLegend                 | 300306        |
| CD56 (NCAM) (clone MEM-188)-FITC         | BioLegend                 | 304604        |
| IRF-3 (clone D6I4C)                      | Cell Signaling Technology | 1190          |
| NF-kB p65 (clone D14E12)                 | Cell Signaling Technology | 8242          |
| Phospho- NF-kB p65 (Ser536) (clone 93H1) | Cell Signaling Technology | 3033          |
| IFI-16 (clone 1G7)                       | Santa Cruz Biotechnology  | Sc-8023       |
| IFI16 (clone 2E3)                        | Abcam                     | ab55328       |
| cGAS (rabbit polyclonal)                 | Abcam                     | ab224144      |
| DDX41 (clone 2F4)                        | Novus Biological          | H00051428-M01 |
| MAVS (polyclonal)                        | Cell Signaling Technology | 3993          |
| Caspase-8 (clone 1C12)                   | Cell Signaling Technology | 9746          |
| MDA-5 (clone D74E4)                      | Cell Signaling Technology | 5321          |
| IFIH1/MDA-5 (rabbit polyclonal)          | Proteintech               | 21775-1-AP    |
| p21 <sup>Waf1/Cip1</sup> (clone 12D1)    | Cell Signaling Technology | 2947          |
| Mek1/2 (clone D1A5)                      | Cell Signaling Technology | 8727          |
| LGP2 (clone D3I3L)                       | Cell Signaling Technology | 12869         |
| Histone H3 (clone D1H2)                  | Cell Signaling Technology | 4499          |
| Calnexin (clone C5C9)                    | Cell Signaling Technology | 2679          |
| RIG-1 (clone D33H10)                     | Cell Signaling Technology | 4200          |

|                                                                              |                           |            |
|------------------------------------------------------------------------------|---------------------------|------------|
| Sting (clone D2P2F)                                                          | Cell Signaling Technology | 38866      |
| Phospho-Sting (Ser366) (clone E9A9K)                                         | Cell Signaling Technology | 50907      |
| Toll-like Receptor 3 (clone D10F10)                                          | Cell Signaling Technology | 6961       |
| KAP1 (TRIM28)                                                                | Proteintech               | 66630-1-IG |
| Poly (ADP-Ribose) Polymerase (PARP)                                          | Biosource International   | AHF0262    |
| Anti-DNA-RNA hybrid [S9.6]                                                   | Kerafast                  | ENH001     |
| Pan-enterovirus 9D5 monoclonal                                               | Millipore Sigma           | 3361       |
| Anti-dsDNA [3519 DNA]                                                        | Abcam                     | Ab27156    |
| Anti-mouse IgG, HRP-linked                                                   | Cell Signaling Technology | 7076       |
| Anti-rabbit IgG, HRP-linked                                                  | Cell Signaling Technology | 7074       |
|                                                                              |                           |            |
| <b>Chemicals, commercial siRNA, Dyes, Peptides, and Recombinant Proteins</b> |                           |            |
| TRIZOL Reagent                                                               | Thermo Fisher Scientific  | 15596026   |
| Human BD Fc Block                                                            | BD Pharmingen             | 564220     |
| RNase-free DNase Set                                                         | Qiagen                    | 79256      |
| RNeasy Mini kit                                                              | Qiagen                    | 74106      |
| RNase Recombinant Ribonuclease Inhibitor                                     | Thermo Fisher Scientific  | N8080119   |
| Halt Protease Inhibitor Cocktail                                             | Thermo Fisher Scientific  | 78429      |
| Silencer Select Pre-Designed siRNA, Gene Symbol: DDX41                       | Thermo Fisher Scientific  | s28122     |
| Silencer Select Pre-Designed siRNA, Gene Symbol: cGAS                        | Thermo Fisher Scientific  | s41748     |
| Silencer Select Pre-Designed siRNA, Gene Symbol: IFI16                       | Thermo Fisher Scientific  | s7136      |
| Silencer Select Negative Control No. 1 siRNA                                 | Thermo Fisher Scientific  | 4390843    |



|                                                                           |                          |                   |
|---------------------------------------------------------------------------|--------------------------|-------------------|
| Lipofectamine RNAiMAX reagent                                             | Thermo Fisher Scientific | 13778             |
| GelCode Blue Safe protein Stain                                           | Thermo Fisher Scientific | 24594             |
| Poly(dA:dT) / Lyovect - dsDNA naked – complexed with transfection reagent | InvivoGen                | tlrl-patc         |
| VACV-70/ LyoVec – dsDNA, CDS agonist complexed with transfection reagent  | InvivoGen                | tlrl-vav70c       |
| LyoVec Cationic lipid for transfection of mammalian cells                 | InvivoGen                | lyec-1            |
|                                                                           |                          |                   |
| <b>Critical Commercial Assays</b>                                         |                          |                   |
| Quanti-Luc, Coelenterazine-based luminescence assay reagent               | InvivoGen                | rep-glc2          |
| Quanti-Blue assay reagent                                                 | InvivoGen                | rep-qbs2          |
| RT <sup>2</sup> Profiler PCR Array Human Type I Interferon Response       | Qiagen                   | 330231 PAHS-016ZA |
| RT <sup>2</sup> Profiler PCR Array Human Cytokines and Chemokines         | Qiagen                   | 330231 PAHS-150ZA |
| MaqQuant Plus DNA V2, DNA normalization kit                               | MaqBio                   | MQP-50010         |
| Pierce BCA Protein Assay Kit                                              | Thermo Fisher Scientific | 23225             |
| Wizard Genomic DNA Purification kit                                       | Promega                  | A1120             |
| Subcellular Protein Fractionation kit for cultured cells                  | Thermo Fisher Scientific | 78840             |
| SsoAdvanced Universal SYBR Green Supermix                                 | Bio-Rad                  | 172-5272          |
| Bio-Plex Pro Human Inflammation customized Screening Panel (10)           | Bio-Rad                  | N/A               |
|                                                                           |                          |                   |
| <b>Experimental Models: Cell Lines, primary cells</b>                     |                          |                   |
| THP1 Human monocytes, acute monocytic leukemia                            | ATCC                     | ATCC-TIB-202      |
| THP1-dual NF- $\kappa$ B-SEAP IRF_Luc reporter Monocytes                  | InvivoGen                | thpd-nfis         |

|                                                        |                             |                                                                                                                       |          |
|--------------------------------------------------------|-----------------------------|-----------------------------------------------------------------------------------------------------------------------|----------|
| THP1-dual-ko-IfnaR2 cells                              | InvivoGen                   | thpd-koifnar2                                                                                                         |          |
| THP1-dual-ko-STING cells                               | InvivoGen                   | thpd-kostg                                                                                                            |          |
| THP1-dual-ko-MAVS cells                                | InvivoGen                   | thpd-komavs                                                                                                           |          |
| THP1-dual-ko-cGAS cells                                | InvivoGen                   | thpd-kocgas                                                                                                           |          |
| THP1-dual-ko-IFI16 cells                               | InvivoGen                   | thpd-koifi16                                                                                                          |          |
| Elutriated monocytes (fraction 5), <i>Homo sapiens</i> | NIH Blood Bank              |                                                                                                                       |          |
|                                                        |                             |                                                                                                                       |          |
| <b>Oligonucleotides</b>                                |                             |                                                                                                                       |          |
| <b>Name</b>                                            | <b>Sequence (5'→3')</b>     |                                                                                                                       |          |
| <i>HERV-specific primers</i>                           |                             |                                                                                                                       |          |
| HERV-Kenv-F                                            | CTGAGGCAATTGCAGGAGTT        | (1)                                                                                                                   |          |
| HERV-Kenv-R                                            | GCTGTCTCTTCGGAGCTGTT        |                                                                                                                       |          |
|                                                        |                             |                                                                                                                       |          |
| <i>Primers for cellular genes (human)</i>              |                             |                                                                                                                       |          |
| hGAPDH-F                                               | TGCACCACCAACTGCTTAGC        | PrimerBank/Human<br>( <a href="https://pga.mgh.harvard.edu/primerbank/">https://pga.mgh.harvard.edu/primerbank/</a> ) |          |
| hGAPDH-R                                               | GGCATGGACTGTGGTCATGAG       |                                                                                                                       |          |
| B-actinF                                               | GTGGGGCGCCCCAGGCACCA        | PrimerBank/Human<br>( <a href="https://pga.mgh.harvard.edu/primerbank/">https://pga.mgh.harvard.edu/primerbank/</a> ) |          |
| B-actinR                                               | CTCCTTAATGTACGCACGATTT<br>C |                                                                                                                       |          |
| GUSb-F                                                 | CACCAGGATCCACCTCTGAT        | (2)                                                                                                                   |          |
| GUSb-R                                                 | TCCAAATGAGCTCTCCAACC        |                                                                                                                       |          |
| IFI16-F                                                | GATGCCTCCATCAACACCAAGC      | OriGene                                                                                                               | HP208650 |
| IFI16-R                                                | CTGTTGCGTTCAGCACCATCAC      | OriGene                                                                                                               | HP208650 |
| MDA5-F                                                 | GCTGAAGTAGGAGTCAAAGCCC      | OriGene                                                                                                               | HP214413 |
| MDA5-R                                                 | CCACTGTGGTAGCGATAAGCAG      | OriGene                                                                                                               | HP214413 |
| SOCS1-F                                                | TTCGCCCTTAGCGTGAAGATGG      | OriGene                                                                                                               | HP207209 |
| SOCS1-R                                                | TAGTGCTCCAGCAGCTCGAAGA      | OriGene                                                                                                               | HP207209 |
| STING-F                                                | CCTGAGTCTCAGAACAAGTCC       | OriGene                                                                                                               | HP219304 |
| STING-R                                                | GGTCTTCAAGCTGCCACAGTA       | OriGene                                                                                                               | HP219304 |

|                                  |                                                                                                                                                                                    |                                                                                                                                                               |          |
|----------------------------------|------------------------------------------------------------------------------------------------------------------------------------------------------------------------------------|---------------------------------------------------------------------------------------------------------------------------------------------------------------|----------|
| ISG15-F                          | CTCTGAGCATCCTGGTGAGGAA                                                                                                                                                             | OriGene                                                                                                                                                       | HP208303 |
| ISG15-R                          | AAGGTCAGCCAGAACAGGTCGT                                                                                                                                                             | OriGene                                                                                                                                                       | HP208303 |
| OAS2-F                           | GCTTCCGACAATCAACAGCCAA<br>G                                                                                                                                                        | OriGene                                                                                                                                                       | HP229366 |
| OAS2-R                           | CTTGACGATTTTGTGCCGCTCG                                                                                                                                                             | OriGene                                                                                                                                                       | HP229366 |
| IFI27-F                          | CGTCCTCCATAGCAGCCAAGAT                                                                                                                                                             | OriGene                                                                                                                                                       | HP208651 |
| IFI27-R                          | ACCCAATGGAGCCCAGGATGAA                                                                                                                                                             | OriGene                                                                                                                                                       | HP208651 |
| VEGFa-F                          | TTGCCTTGCTGCTCTACCTCCA                                                                                                                                                             | OriGene                                                                                                                                                       | HP202779 |
| VEGFa-R                          | GATGGCAGTAGCTGCGCTGATA                                                                                                                                                             | OriGene                                                                                                                                                       | HP202779 |
| RIGI-F                           | CACCTCAGTTGCTGATGAAGGC                                                                                                                                                             | OriGene                                                                                                                                                       | HP210787 |
| RIGI-R                           | GTCAGAAGGAAGCACTTGCTAC<br>C                                                                                                                                                        | OriGene                                                                                                                                                       | HP210787 |
| TLR7-F                           | CTTTGGACCTCAGCCACAACCA                                                                                                                                                             | OriGene                                                                                                                                                       | HP212264 |
| TLR7-R                           | CGCAACTGGAAGGCATCTTGTA<br>G                                                                                                                                                        | OriGene                                                                                                                                                       | HP212264 |
| VACV70-DNA                       | CCA TCA GAA AGA GGT TTA<br>ATA TTT TTG TGA GAC CAT<br>CGA AGA GAG AAA GAG ATA<br>AAA CTT TTT TAC GAC T                                                                             | IDT                                                                                                                                                           | N/A      |
| VACV70-<br>RNA_anti              | rArGrU rCrGrU rArArA rArArA<br>rGrUrU rUrUrA rUrCrU rCrUrU<br>rUrCrU rCrUrC rUrUrC rGrArU<br>rGrGrU rCrUrC rArCrA rArArA<br>rArUrA rUrUrA rArArC rCrUrC<br>rUrUrU rCrUrG rArUrG rG | IDT                                                                                                                                                           | N/A      |
| <b>Software and Algorithms</b>   |                                                                                                                                                                                    |                                                                                                                                                               |          |
| SnapGene                         |                                                                                                                                                                                    | <a href="http://www.snapgene.com">www.snapgene.com</a>                                                                                                        |          |
| GeneAssist™ Custom siRNA Builder |                                                                                                                                                                                    | <a href="https://www.thermofisher.com/order/custom-genomic-products/tools/sirna/">https://www.thermofisher.com/order/custom-genomic-products/tools/sirna/</a> |          |
| FlowJo                           |                                                                                                                                                                                    | <a href="http://www.flowjo.com">www.flowjo.com</a>                                                                                                            |          |
| INSPIRE                          |                                                                                                                                                                                    | <a href="http://www.amnis.com">www.amnis.com</a>                                                                                                              |          |

|                                     |                                                                                                                                                                                                                                                                     |  |
|-------------------------------------|---------------------------------------------------------------------------------------------------------------------------------------------------------------------------------------------------------------------------------------------------------------------|--|
| CFX Manager™ Software v3.1          | <a href="https://www.bio-rad.com/en-us/product/previous-qpcr-software-releases?ID=OO2BB34VY&amp;source_wt=cfx-manager-software_surl">https://www.bio-rad.com/en-us/product/previous-qpcr-software-releases?ID=OO2BB34VY&amp;source_wt=cfx-manager-software_surl</a> |  |
| ImageJ                              | <a href="https://imagej.nih.gov/">https://imagej.nih.gov/</a>                                                                                                                                                                                                       |  |
| Bcl2fastq2 conversion software 2.20 | <a href="https://support.illumina.com/downloads/bcl2fastq-conversion-software-v2-20.html">https://support.illumina.com/downloads/bcl2fastq-conversion-software-v2-20.html</a>                                                                                       |  |
| FastQC                              | <a href="http://www.bioinformatics.babraham.ac.uk/projects/fastqc/">http://www.bioinformatics.babraham.ac.uk/projects/fastqc/</a>                                                                                                                                   |  |
| Trimmomatic                         | <a href="http://www.usadellab.org/cms/?page=trimmomatic">http://www.usadellab.org/cms/?page=trimmomatic</a>                                                                                                                                                         |  |
| STAR                                | <a href="https://github.com/alexdobin/STAR">https://github.com/alexdobin/STAR</a>                                                                                                                                                                                   |  |
| Samtools                            | <a href="http://samtools.sourceforge.net/">http://samtools.sourceforge.net/</a>                                                                                                                                                                                     |  |
| Ensembl                             | <a href="ftp://ftp.ensembl.org/pub/release-99/gtf/homo_sapiens/Homo_sapiens.GRCh38.99.gtf.gz">ftp://ftp.ensembl.org/pub/release-99/gtf/homo_sapiens/Homo_sapiens.GRCh38.99.gtf.gz</a>                                                                               |  |
| TEtranscripts                       | <a href="http://labshare.cshl.edu/shares/mhammel/lab/www-data/TEtranscripts/TE_GTF/GRCh38_rm_sk_TE.gtf.gz">http://labshare.cshl.edu/shares/mhammel/lab/www-data/TEtranscripts/TE_GTF/GRCh38_rm_sk_TE.gtf.gz</a>                                                     |  |
| TEcount                             | <a href="https://pypi.org/project/TEtranscripts/">https://pypi.org/project/TEtranscripts/</a>                                                                                                                                                                       |  |
| R                                   | <a href="https://cran.r-project.org/">https://cran.r-project.org/</a>                                                                                                                                                                                               |  |
| OriginPro 2019                      | <a href="http://www.originlab.com">www.originlab.com</a>                                                                                                                                                                                                            |  |

|                                           |                                                                 |          |
|-------------------------------------------|-----------------------------------------------------------------|----------|
| ClustalW (CLCbio Genomics Workbench, v11) | <a href="http://www.qiagen.com">www.qiagen.com</a>              |          |
| JalView                                   | <a href="https://www.jalview.org/">https://www.jalview.org/</a> |          |
| <b>Other</b>                              |                                                                 |          |
| RIPA buffer                               | Thermo Fisher Scientific                                        | 89900    |
| Normocin                                  | InvivoGen                                                       | Ant-nr-1 |
| Nytran N45, Nylon Blotting Membrane       | Whatman                                                         | 10416194 |
| RNAse H                                   | New England Biolabs                                             | M0297    |
| Clarity Western ECL Substrate             | Bio-Rad                                                         | 1705080  |

## References

1. Li W, Lee MH, Henderson L, Tyagi R, Bachani M, Steiner J, et al. Human endogenous retrovirus-K contributes to motor neuron disease. *Science translational medicine*. 2015;7(307):307ra153.
2. Zhang SY, Clark NE, Freije CA, Pauwels E, Taggart AJ, Okada S, et al. Inborn Errors of RNA Lariat Metabolism in Humans with Brainstem Viral Infection. *Cell*. 2018;172(5):952-65 e18.
